# Supplementary material
Source: bioRxiv or medRxiv preprint supplement (https://www.biorxiv.org/highwire/filestream/45789/field_highwire_adjunct_files/12/119420-6.pdf)
Supplement: Supplementary file [file 119420-6.pdf]

*B. cereus s. l.* query genomes

genome annotation: Prokka

protein-coding gene annotations

orthology determination: HaMStR

orthologous sequence clusters

multiple sequence alignment: MAFFT

aligned sequence clusters

consensus procedure

aligned clusters (one sequence per taxon)

concatenation

CONCATENATED\_DATA\_MATRIX
